# Supplementary material for: High CIB1 expression in colorectal cancer liver metastases correlates with worse survival and the replacement histopathological growth pattern
Source: PubMed Central journal article supplement — Mol Ther Oncol. 2024 Jun 9;32(3):200828. doi: 10.1016/j.omton.2024.200828 (PMC11278321; doi:10.1016/j.omton.2024.200828), 2024-06-09
Supplement: mmc1.pdf [file mmc1.pdf]

**Supplemental information**

**High CIB1 expression in colorectal cancer liver  
metastases correlates with worse survival and the  
replacement histopathological growth pattern**

**Shuang Fan, Johannes Robert Fleischer, Lolita Dokshokova, Lena Sophie Böhme, Gwendolyn Haas, Alexandra Maria Schmitt, Fabio Bennet Gätje, Linde-Allegre Emmalie Rosen, Hanibal Bohnenberger, Michael Ghadimi, Baolong Cui, Xingbo Xu, Joanna Maria Kalucka, Florian Bösch, Tiago De Oliveira, and Lena-Christin Conradi**

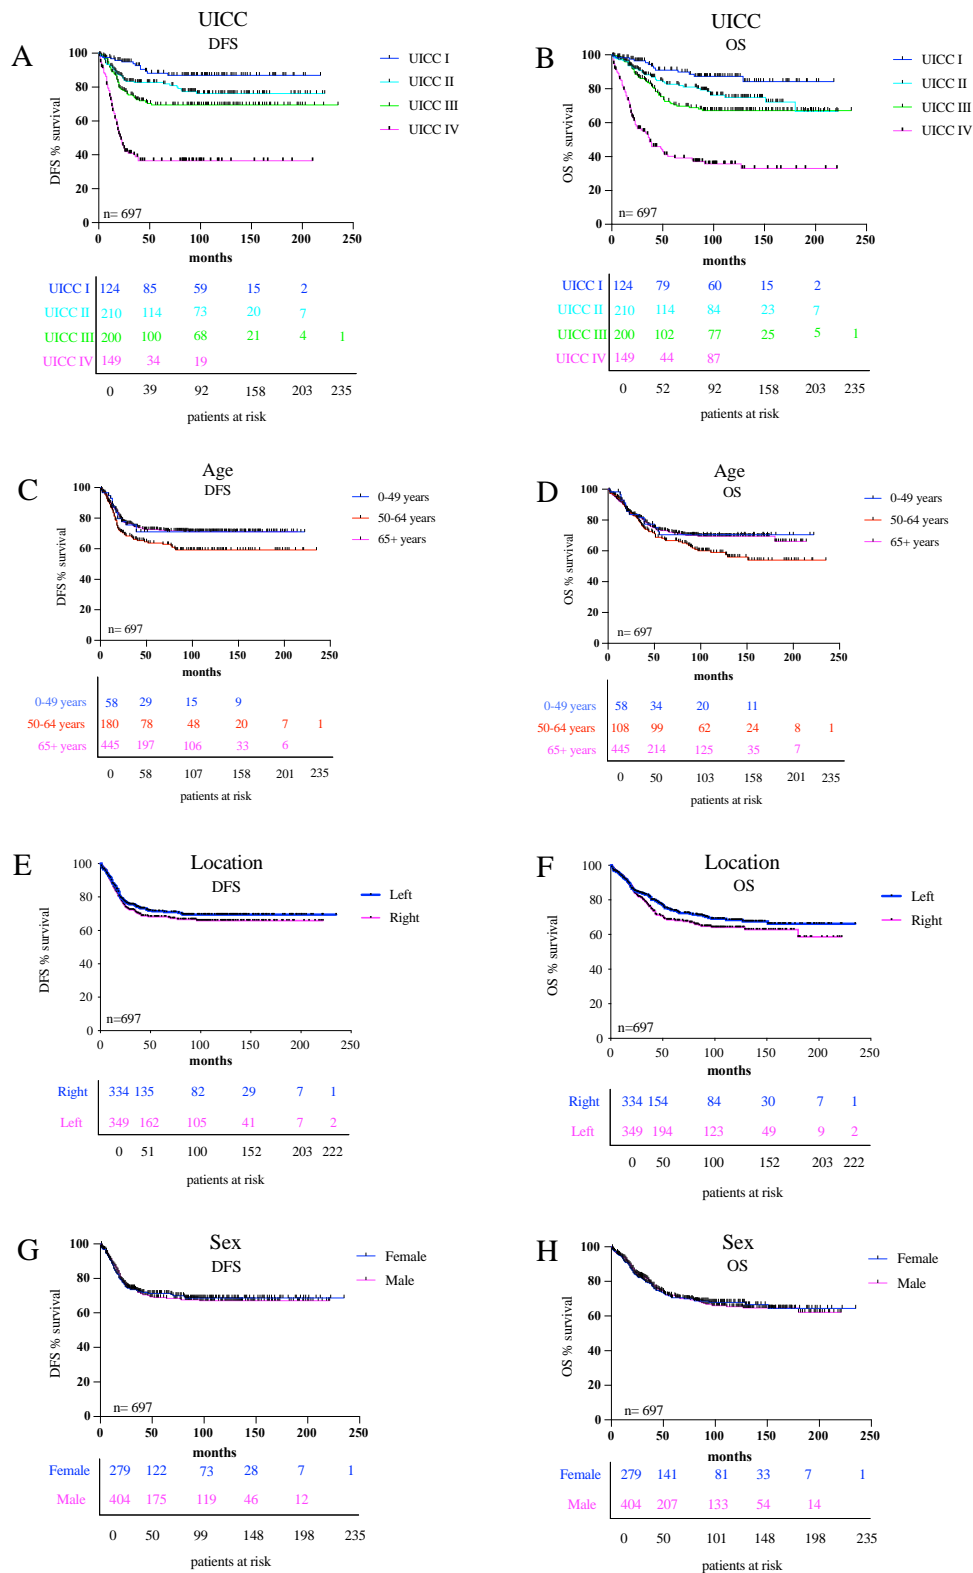

**Figure S1.** Correlation between Survival and UICC Stage, Independent of Age, Distribution, and Gender in Cancer Patients. (A-B) Kaplan-Meier curves: OS and DFS in a cohort of 697 CRC patients classified according to the pUICC. (C-D) Kaplan-Meier curves: OS and DFS in a cohort of 697 CRC patients classified according to the different age groups. (E-F) Kaplan-Meier curves: OS and DFS in a cohort of 697 CRC patients classified according to the tumor location (right vs. left). (G-H) Kaplan-Meier curves: OS and DFS in a cohort of 697 CRC patients classified according to the sex.

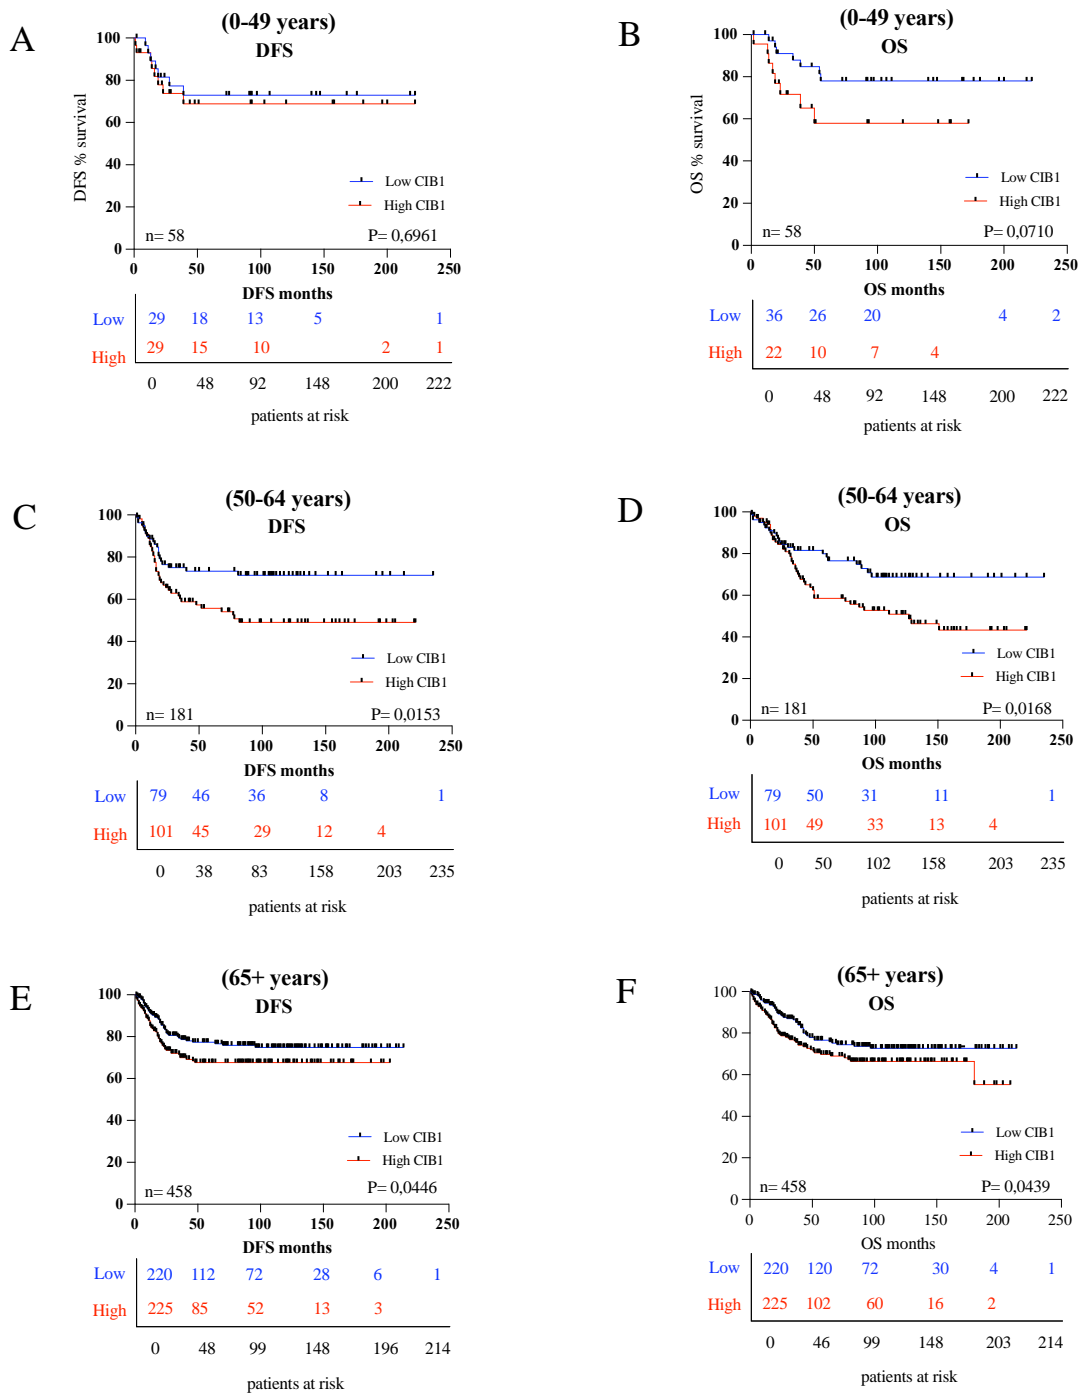

**Figure S2.** Comparison of OS and DFS curves for features related to CIB1 protein expression in different age groups of patients with colorectal cancer. (A and B) Kaplan-Meier curves: OS and DFS in a cohort of 58 CRC patients in the age group 0-49 years. (C and D) Kaplan-Meier curves: OS and DFS in a cohort of 181 CRC patients in the age group 50-64 years. (E and F) Kaplan-Meier curves: OS and DFS in a cohort of 458 CRC patients in the age group 65 years and older.

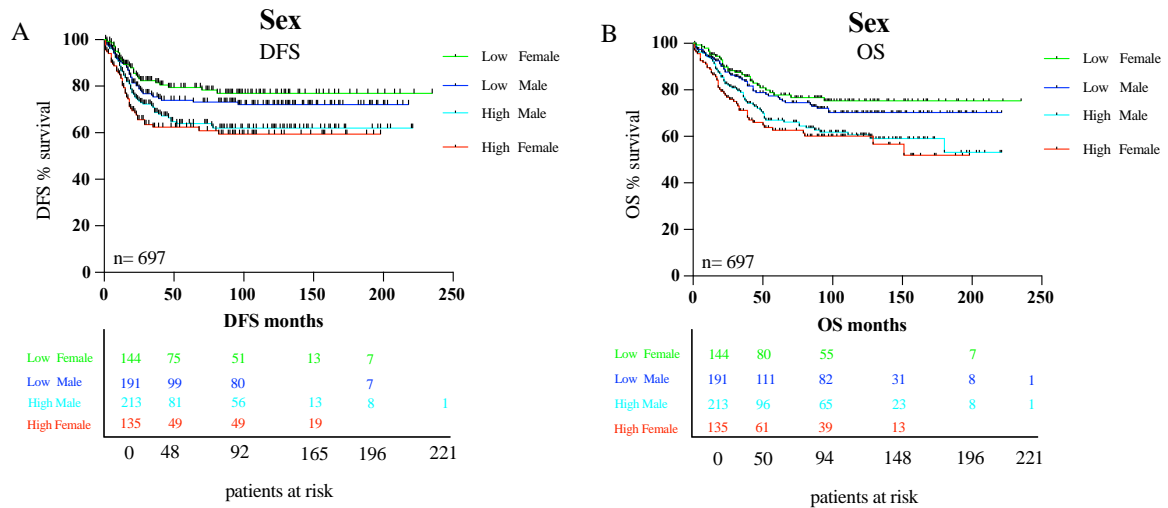

**Figure S3.** Expression-associated features of CIB1 protein in colorectal cancer patients across gender groups. (A) Kaplan-Meier curves: OS in a cohort of 697 CRC patients stratified for high and low protein expression of CIB1 classified according to the Sex. (B) Kaplan-Meier curves: DFS in a cohort of 697 CRC patients stratified for high and low protein expression of CIB1 classified according to the sex.

**A CIB1 expression in a bulk seq dataset**

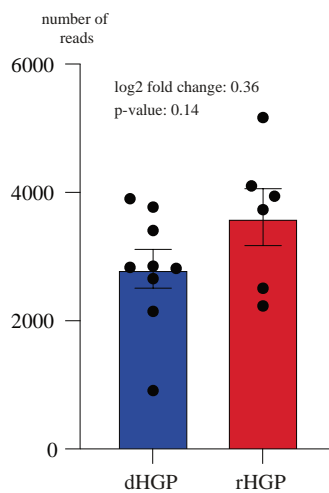

**Figure S4.** CIB1 expression in bulk sequencing data set. (A) bar plot: differential gene expression analysis of 9 dHGP vs 6 rHGP cancer samples of bulkRNA sequencing.

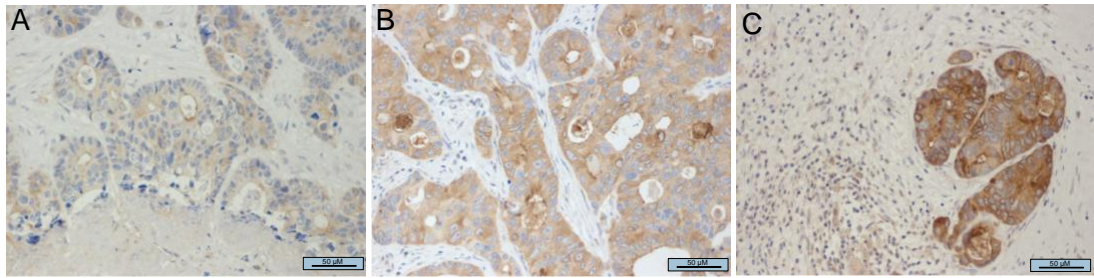

**Figure S5.** Immunohistochemical staining of CIB-1: colorectal cancer liver metastases. (A) Representative immunohistochemical staining: CRCLM with weak CIB1 expression. (B) Representative immunohistochemical staining: CRCLM with moderate CIB1 expression. (C) Representative immunohistochemical staining: CRCLM with strong CIB1 expression.
